# Supplementary material
Source: PubMed Central journal article supplement (PMC5479148)
Supplement: mmc1.pdf [file mmc1.pdf]

**Biophysical Journal, Volume 112**

**Supplemental Information**

**Actin Filament Strain Promotes Severing and Cofilin Dissociation**

**Anthony C. Schramm, Glen M. Hocky, Gregory A. Voth, Laurent Blanchoin, Jean-Louis Martiel, and Enrique M. De La Cruz**

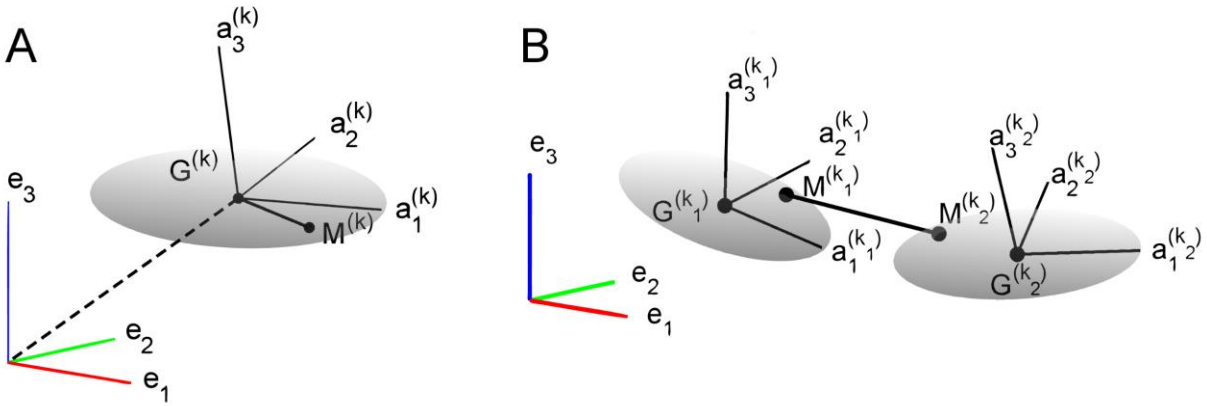

FIGURE S1 A) Depiction of the mass center  $\mathbf{G}^{(k)}$  vector and local reference frame vectors  $\mathbf{a}^{(k)_1}$ ,  $\mathbf{a}^{(k)_2}$ , and  $\mathbf{a}^{(k)_3}$  of protein  $k$ , as well as the vector from the mass center to the protein surface at point  $\mathbf{M}^{(k)}$ . B) Depiction of a bond between the surface points  $\mathbf{M}^{(k_1)}$  and  $\mathbf{M}^{(k_2)}$  of proteins  $k_1$  and  $k_2$ .
